# Supplementary material
Source: bioRxiv or medRxiv preprint supplement (https://www.biorxiv.org/content/biorxiv/early/2019/08/06/726737.1/DC2/embed/media-2.pdf)
Supplement: Supplementary file [file media-2.pdf]

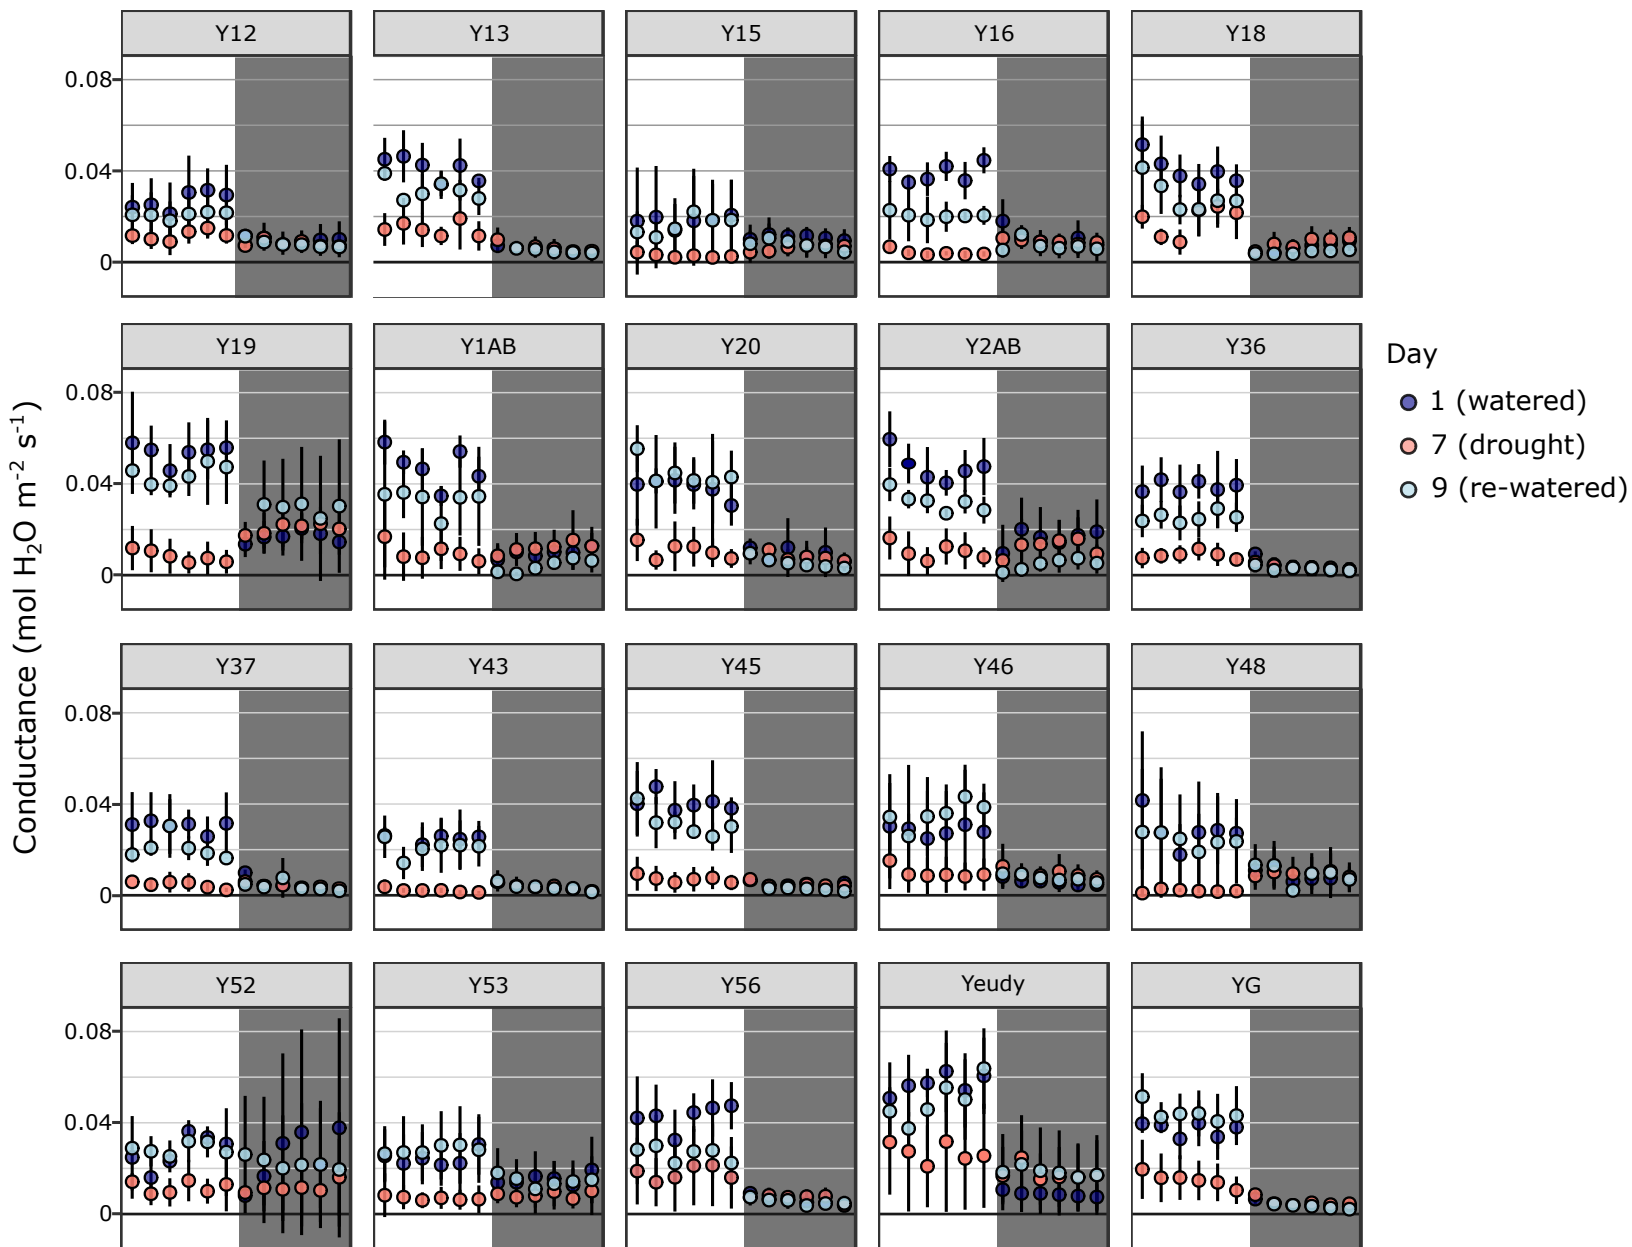

**Supplemental Figure 2** - Conductance measurements from *Y. glorioza* genotypes measured every two hours over a 24 hour period, beginning 1 hour after the lights turned on (8 a.m.). White and grey backgrounds specify day and night timepoints, respectively. Mean and standard deviation are shown for day 1 (well watered), day 7 (drought), and day 9 (re-watered).
